# Supplementary material
Source: Elsevier journal article supplement (https://www.sciencedirect.com/science/article/pii/S0121812321000426)
Supplement: mmc1 [file S0121812321000426:mmc1.pdf]

Osteoporosis and avascular necrosis in lupus

Osteoporosis y osteonecrosis en lupus eritematoso sistémico

Osteoporosis and osteonecrosis in systemic lupus erythematosus

Andreu Fernández-Codina<sup>1,2,3\*\*</sup>, Janet E Pope<sup>1</sup>

Afiliaciones:

<sup>1</sup>División de Reumatología, Departamento de Medicina, Universidad de Western Ontario, Schulich School of Medicine & Dentistry, London, Ontario, Canadá

<sup>2</sup> Departamento General de Medicina Interna - Windsor campus, Windsor, Ontario, Canadá

<sup>3</sup> División de Enfermedades Autoinmunes. Hospital Clinic i Provincial, Barcelona, España

**\*\*Autor para correspondencia:** Andreu Fernández-Codina

268 Grosvenor St. Saint Joseph's Health Care London, Rheumatology Center, Monsignor Rodney Bld. D2-191. N6A4V2, London, ON, Canada

Fax +1 (519) 668-7979; correo electrónico: [Andreu.fernandezcodina@wrh.on.ca](mailto:Andreu.fernandezcodina@wrh.on.ca)

## RESUMEN

La mitad de los pacientes con lupus eritematoso sistémico (LES) tendrán una densidad ósea disminuida y más de uno de cada diez desarrollará osteoporosis (OP) prematuramente. Son múltiples los factores de riesgo que se han relacionado con la pérdida de la masa ósea, pero solo unos pocos son modificables, tales como la ingesta de niveles adecuados de vitamina D y de calcio, ejercicio con pesas, controlar la actividad del LES, y limitar el uso de glucocorticoides (GC). También se ha encontrado una estrecha relación entre el uso de GC y osteonecrosis o a necrosis avascular (NAV). Las principales consecuencias de la OP y de la NAV son fracturas, que generan una limitación funcional importante, pérdida de la calidad de vida y aumento de la morbilidad. Las fracturas por osteoporosis se pueden reducir mediante un tamizaje adecuado

## Osteoporosis and avascular necrosis in lupus

con densitometría ósea y administrando tratamiento profiláctico cuando se requieren GC de largo plazo o a altas dosis. No existe un tamizaje formal para la NAV, pero su diagnóstico se realiza con imágenes (radiografía, gammagrafía ósea, o imágenes avanzadas cuando corresponda). El apuntar a la menor dosis posible de GC, en combinación con inmunosupresión, además de la temprana identificación de los síntomas, ayudará a prevenir otras complicaciones.

El presente artículo es una revisión práctica de la epidemiología, la fisiopatología y el manejo de la OP y la NAV, en pacientes con LES, en función de la evidencia y de las guías disponibles.

**PALABRAS CLAVES:** lupus eritematoso sistémico, osteoporosis, osteonecrosis, NAV, necrosis avascular, fractura, LES, lupus, glucocorticoides, anticuerpos antifosfolípidos, insuficiencia renal.

### ABSTRACT

Half of the patients with systemic lupus erythematosus (SLE) will have a reduced bone density and more than one in ten will develop osteoporosis (OP) prematurely. Multiple risk factors have been related to loss of bone mass, but just a few are modifiable, such as adequate vitamin D and calcium intakes, weight bearing exercise, controlling SLE activity and limiting the use of glucocorticoids (GC). GC have also been strongly associated to osteonecrosis or avascular necrosis (AVN). The main consequences of OP and AVN are fractures, which lead to significant functional limitation, loss of quality of life and increased morbidity. OP-related fractures can be reduced by performing appropriate screening with bone densitometries and providing prophylactic treatment when long-term or high dose GC are needed. No formal screening is available for AVN; but diagnosis is made by imaging (X-ray, bone scan or advanced imaging where appropriate). Aiming for the lowest dose possible of GC in combination with immunosuppression as well as an early recognition of the symptoms will prevent further complications.

This manuscript is a practical review of the epidemiology, pathophysiology, and management of OP and AVN in patients with SLE, based on the available evidence and guidelines.

## Osteoporosis and avascular necrosis in lupus

**KEYWORDS:** systemic lupus erythematosus, osteoporosis, osteonecrosis, AVN, avascular necrosis, fracture, SLE, lupus, glucocorticoids, antiphospholipid antibodies, renal failure.

## Osteoporosis and avascular necrosis in lupus

### INTRODUCCIÓN:

La salud ósea en pacientes con lupus eritematoso sistémico (LES) está influenciada por múltiples factores que pueden generar diferentes complicaciones, incluyendo osteoporosis (OP), fracturas por fragilidad y osteonecrosis (llamada también necrosis avascular, NAV). Una disminución de la masa ósea se traduce en baja densidad mineral ósea (DMO) y puede llevar a osteopenia, OP y eventualmente fracturas por fragilidad. La osteonecrosis subcondral como resultado de deficiencia en la irrigación sanguínea produce NAV. La OP y la NAV son patologías prevalentes en LES, a pesar de la juventud de las personas que viven con LES. Estas complicaciones generan una significativa morbilidad, mortalidad, discapacidad y pérdida de calidad de vida. El presente trabajo revisa la epidemiología, la fisiopatología, el diagnóstico y el manejo de estas condiciones.

### EPIDEMIOLOGÍA:

Osteoporosis. La OP puede tener una mayor prevalencia en LES por múltiples razones. La OP puede dividirse en post-menopáusica, senil y por causas secundarias tales como la osteoporosis inducida por glucocorticoides (OPIG), razones metabólicas (tales como disfunción paratiroidea en pacientes con LES y disfunción renal) y fármacos tales como la heparina y los anticonvulsivantes.

En la literatura se han reportado de manera consistente bajos índices de DMO entre los pacientes con LES. [1,2] A fin de agrupar todos los datos, Xia et al. llevaron a cabo un meta-análisis en el 2019, incluyendo 70 estudios y 33.500 pacientes. [3] La mitad de los estudios incluidos se publicaron después de 2010, por lo cual los datos pueden generalizarse al tratamiento contemporáneo. La prevalencia en LES de una baja DMO, osteopenia, y OP fue de 45% (IC 95% 38-51;  $I^2$  96,6%), 38% (IC 95% 31-45;  $I^2$  95,2%) y 13% (IC 95% 11-16;  $I^2$  90,8%), respectivamente. Las pacientes postmenopáusicas presentaban más osteoporosis (21 vs 9%) y menos osteopenia (25 vs 42%), en comparación con las pacientes pre-menopáusicas. Se encontró que la columna lumbar tenía más osteoporosis que la cadera. La prevalencia de la osteoporosis aumentó con la edad, en tanto que la baja DMO/osteopenia mostró una prevalencia en U a lo largo del tiempo, con menor DMO tanto en los pacientes jóvenes como en los añosos.

## Osteoporosis and avascular necrosis in lupus

Los factores de riesgo de una baja DMO fueron la condición postmenopáusica, no ser de raza afro-caribeña, mayor índice de masa corporal, número de nacimientos, haber tomado prednisona a dosis de >10mg/día, y una dosis máxima de >50mg/día de corticoesteroides por vía oral. Los predictores de osteoporosis fueron la menopausia, la duración de la enfermedad y el uso de prednisona. La duración de la enfermedad, un mayor IMC, historia de fracturas, uso de corticoesteroides, convulsiones, eventos cerebrovasculares, y mayor daño (medido según el Índice de Daño de Systemic Lupus International Collaborating Clinics/American College of Rheumatology Damage Index (SLICC/ACR DI), fueron todos factores de riesgo de fractura estadísticamente significativos. Adicionalmente, los pacientes con LES presentan menores niveles de vitamina D, en comparación con la población general y es común la deficiencia de vitamina D. [4] La deficiencia de vitamina D no es específica de LES, pues se ha reportado consistentemente en muchas otras enfermedades autoinmunes. [5] Los bajos niveles de vitamina D se han asociado a una baja DMO y a fracturas en los pacientes con LES. Un estudio poblacional en más de 10.000 pacientes con LES en Corea, de 40 años de edad o más, mostró que las fracturas por osteoporosis fueron tres veces más frecuentes que en los controles equiparados por edad y sexo. [6] En un estudio en el Reino Unido, utilizando una base de datos administrativa de 7732 pacientes con LES y 28079 controles equiparados, se reportó que las fracturas por osteoporosis fueron 2,5 veces más frecuentes en presencia de LES que en los controles. [7]

Los hombres con LES y baja masa ósea pueden asociarse a anomalías en las hormonas sexuales. Un pequeño estudio en 40 hombres con LES, mostró que una DMO disminuida de la columna lumbar, se asociaba con la edad, el consumo frecuente de alcohol, bajo IMC y altas dosis de GCs. [8]

Osteonecrosis. Se reportan diferentes tasas de NAV en LES. Un meta-análisis en 2017 incluyó 58 estudios y más de 23.000 pacientes con LES. [9] La prevalencia de NAV varió entre 1,45% y 33%. Los pacientes se dividieron entre NAV sintomática y asintomática. Sorprendentemente, se utilizaron técnicas diagnósticas diferentes en los diferentes lugares en los varios estudios, lo cual dio lugar a una alta heterogeneidad en la frecuencia de NAV. La prevalencia en conjunto de la NAV sintomática fue de 8,96% (IC 95% 7,37-10,55; I<sup>2</sup> 93%); la cabeza del fémur fue el sitio más común (8,0%, IC 95% 5,88-10,12; I<sup>2</sup> 84%). La prevalencia en conjunto de la NAV asintomática

## Osteoporosis and avascular necrosis in lupus

fue de 28,52% (IC 95% 19,46, 37,60, I<sup>2</sup> 80%), cuando se evaluaron múltiples localizaciones utilizando diferentes técnicas de imágenes, tales como radiografía, gammagrafía ósea y resonancia magnética. De acuerdo con el estudio más grande publicado hasta la fecha, la NAV se diagnostica típicamente 8 años después del diagnóstico de LES, a una media de edad de 37 años cuando se detecta la NAV y 14% (234 de 1.729) tenían osteonecrosis. [10] Las articulaciones más frecuentemente comprometidas fueron las caderas y las rodillas, pero puede haber compromiso de otras articulaciones como los hombros, los codos y los tobillos. La frecuencia de VAN ha venido disminuyendo desde 1970 a 2000 y pareciera haberse nivelado desde entonces. Esto pudiera deberse a cambios en la epidemiología de LES a lo largo del tiempo (tal vez una enfermedad más leve con el tiempo), menos uso de corticoesteroides en el largo plazo y/o menos falla renal terminal.

Son muchos los factores que hipotéticamente se han relacionado con NAV. En esta cohorte longitudinal [10], no se encontraron diferencias entre casos de NAV y controles equiparados LES con respecto a tabaquismo, síndrome antifosfolípido, vasculitis, edad, duración de la enfermedad o tratamiento inmunosupresor. Solo el uso de GC alcanzó significación estadística en su análisis multivariado. Adicionalmente, un meta-análisis que revisó la presencia de NAV en pacientes con LES, mostró que los pacientes que desarrollaron NAV más probablemente tenían historia de consumir GC (OR 1,79) así como uso actual de GC (OR 2,98). Más aun, los pacientes con NAV tenían una mayor dosis acumulada de GC que los pacientes sin NAV (OR 3,71). [11] En el meta-análisis de Nevskaya [9], se identificaron los siguientes factores de riesgo pertinentes: etnia afroamericana (OR 1,79), LES neuropsiquiátrico (OR 1,99), vasculitis cutánea (OR 2,08), fenómeno de Raynaud (OR 1,26), síndrome de Sjogren (OR 3,09), artritis (OR 1,69), serositis (OR 1,8), citopenia (OR 1,92), y anticuerpo anticardiolipina IgM positivo (OR 2,48). Resulta interesante que la OP y las fracturas por osteoporosis no mostraron ninguna asociación significativa con NAV. En términos de tratamiento, el uso de GC (OR 3,02), especialmente en pulsos (OR 1,95) aumentó significativamente el riesgo de osteonecrosis. Las mayores dosis acumuladas de GC (7 g) y las dosis diarias máximas (>10 mg/día) se encontraron en pacientes con LES con NAV, en comparación con los pacientes sin NAV. [9] Otros han reportado que la enfermedad renal y la apariencia cushingoide relacionada con esteroides e hipertensión, también

## Osteoporosis and avascular necrosis in lupus

eran factores de riesgo, pero el riesgo más consistente pareciera ser el uso de glucocorticoides.[11,12]

### FISIOPATOLOGÍA:

Remodelación ósea normal. El mecanismo de remodelación ósea es un equilibrio entre formación y resorción ósea. Los principales tipos celulares involucrados son los osteoblastos, los osteocitos y los osteoclastos. Los osteoblastos producen entre otros, la matriz ósea extracelular. El proceso da lugar a la deposición de hidroxapatita de calcio en el hueso. Este mecanismo involucra al receptor activador del factor nuclear  $\kappa$ B, ligando de RANK (RANK-L), el cual es secretado por los pre-osteoblastos. Esta proteína puede estimular tanto a los osteoblastos, como a los osteoclastos. Al fijarse a la osteoprotegerina, RANKL estimula la formación de hueso por los osteoblastos. Por el contrario, al fijarse a RANK, el linaje pre-osteoclástico se diferencia en osteoclastos y se estimula la resorción ósea. [13] Los osteocitos actúan como mecanorreceptores de la respuesta adaptativa al estrés mecánico óseo y además tienen una función endocrina, controlando la homeostasis de la matriz ósea y el equilibrio calcio – fosfato. [14] Todo el proceso se puede ver influenciado por diferentes condiciones y situaciones que modifican el equilibrio a través de citocinas pro-inflamatorias u hormonas.

Osteoporosis postmenopáusica. Los receptores estrogénicos están presentes en todas las líneas celulares en la matriz ósea. Más aún, su desregulación crea un ambiente microinflamatorio que produce un recambio óseo anormal. La privación de estrógenos, que ocurre fundamentalmente después de la menopausia, lleva a resorción ósea y pérdida de la densidad ósea. Los estrógenos promueven la diferenciación de los osteoblastos y la deposición de la matriz de colágeno. También actúan amplificando la vía RANKL en los osteoblastos, y sub-regulando la vía RANK en los osteoclastos. En ausencia de estrógenos, aumenta la expresión RANKL, junto con el factor de necrosis tumoral alfa, la interleucina (IL) 1n iL-6 y los linfocitos. [13] Esta situación lleva a la proliferación de los osteoclastos y aumento de la pérdida ósea. Finalmente, también se deteriora la actividad de los osteocitos. En resumen, hay una mayor resorción del hueso trabecular durante los primeros años, seguida posteriormente de una pérdida más lenta de hueso trabecular y cortical.

## Osteoporosis and avascular necrosis in lupus

Osteoporosis inducida por glucocorticoides. El tratamiento con glucocorticoides (GC), especialmente a altas dosis, induce una resorción ósea significativa durante el primer año de tratamiento, seguida de una disminución de la formación ósea en el largo plazo. [15] Los GCs cambian la diferenciación celular pre-osteoblástica hacia la formación de adipocitos. Adicionalmente, se reduce la osteoblastogénesis por la sobre-expresión de esclerostina. Más aún, las altas dosis de GC inducen la apoptosis de los osteoblastos. Los GC también incrementan la producción de RANKL y reducen la osteoprotegerina. En consecuencia, habrá menor formación de hueso y los osteoblastos aumentarán su actividad de resorción ósea. Los efectos sobre los osteocitos, con aumento de la apoptosis, alteran la homeostasis de la matriz ósea. En el largo plazo, la osteoclastogénesis disminuye debido a una reducción en la población celular. Los GC tienen efectos fuera de la matriz ósea que pueden afectar la salud del hueso. Se reducen la absorción intestinal del calcio, así como la reabsorción del calcio en los riñones. El uso de los glucocorticoides produce alteraciones hormonales como aumento de la hormona paratiroidea (PTH) y disminución del factor de crecimiento semejante a la insulina tipo 1 y de la hormona de crecimiento. Todos estos mecanismos auxiliares contribuyen a la pérdida de masa ósea.

Hay otros medicamentos que pueden producir osteoporosis secundaria, como los anticonvulsivantes (carbamazepina y fenitoina), uso de heparina de largo plazo, uso de progesterona en el largo plazo (acetato de medroxiprogesterona inyectado como anticonceptivo), inhibidores de la bomba de proton, inhibidores de la aromatasa, terapia anti-androgénica, sobre-reemplazo de la hormona tiroidea y medicamentos que generan falla ovárica prematura (tales como la ciclofosfamida). [16–19] Otras asociaciones con osteoporosis en pacientes con LES pueden ser el hipertiroidismo concomitante, enfermedad celíaca, enfermedad del intestino irritable, y problemas relacionados con LES tales como falla renal, inflamación sistémica y anticuerpos anti-vitamina D, así como una menopausia prematura y/o bajos niveles de estrógenos y andrógenos.

Necrosis Avascular (NAV)/Osteonecrosis. Existen múltiples factores que contribuyen al desarrollo de NAV, entre ellos la genética, factores metabólicos como el uso de medicamentos o sustancias tóxicas, así como condiciones pre-existentes. [20] La presencia de LES y el uso de GC se asocia marcadamente con la necrosis avascular. [10] Durante las exacerbaciones de LES,



## Osteoporosis and avascular necrosis in lupus

los niveles elevados de homocisteína, anticuerpos antifosfolípidos, factor de necrosis tumoral elevado, y daño y muerte de los osteocitos, pueden contribuir a la alteración del flujo sanguíneo hacia el hueso trabecular. [21] En consecuencia, la presencia de infartos óseos pudieran fomentar la necrosis del hueso. Luego de un proceso de reparación con deposición de cartílago sobre hueso muerto, la estructura colapsa y se produce una fractura.

### DIAGNÓSTICO:

Osteoporosis. El diagnóstico de la osteoporosis en adultos se basa en los resultados de absorciometría de rayos X de doble energía (DXA), una técnica no invasiva, de densitometría ósea (DMO), que puede realizarse con relativa facilidad. Existe una marcada correlación entre la capacidad de atenuación de los tejidos (huesos) en la radiografía y la resistencia ósea. A pesar de que pueden medirse diferentes áreas para detectar osteoporosis, la densidad ósea del cuello del fémur es el lugar preferido en estudios epidemiológicos [22], mientras que suelo utilizarse la columna lumbar para el seguimiento del tratamiento para la osteoporosis. La definición de osteoporosis de la Organización Mundial de la Salud es una DMO mayor a -2,5 desviaciones estándar (DE) en un hombre o mujer de 30 años de edad (T-score) [23], que suele aplicarse a personas de más de 65 años (incluyendo a mujeres post-menopáusicas). El uso del Z-score (comparación con la DMO de individuos sanos normales de la misma edad y sexo) puede considerarse en pacientes más jóvenes. [24] Finalmente, y fuera del alcance de esta revisión, se define la osteoporosis de la niñez por la presencia de una o más fracturas vertebrales por compresión. [25]

Necrosis Avascular (NAV)/Osteonecrosis. La sospecha clínica de NAV se basa en dolor articular que puede empeorar gradualmente en la zona de la cadera (ingle) y puede estar asociada con una menor amplitud de movimiento que suele ser bilateral. Cuando se sospeche NAV, deben hacerse imágenes. [26] Existe una gran heterogeneidad en los estudios que pueden realizarse para llegar a este diagnóstico, pero los más frecuentes son radiografía simple (que solamente detecta cambios tardíos con colapso del hueso y/o estenosis secundaria del espacio articular), imágenes por resonancia magnética (IRM) y gammagrafía ósea. [9]. Basándose en el sitio más frecuente de NAV, la cadera, Arlet y Ficat desarrollaron una clasificación de severidad de 4

## Osteoporosis and avascular necrosis in lupus

etapas [27]: 1) cadera normal en la radiografía pero diagnosticada con resonancia magnética, 2) presencia de radiolucencia o esclerosis de la cabeza del fémur en la radiografía, 3) un signo de luna creciente en la cabeza femoral, indicativo de un estadio avanzado, y 4) compromiso acetabular y estenosis. En un estudio, la gammagrafía ósea (cintigrafía ósea) mostró una menor sensibilidad que la resonancia magnética de las articulaciones afectadas (56 vs 100%) por NAV sintomática multifocal. [28] En la Figura 1 se muestra un ejemplo de NAV. No obstante, el acceso a una radiografía simple o a una gammagrafía ósea, pudiera ser más factible que a resonancia magnética, pues los tiempos de espera y los costos financieros son significativamente mayores para ésta última. [29]

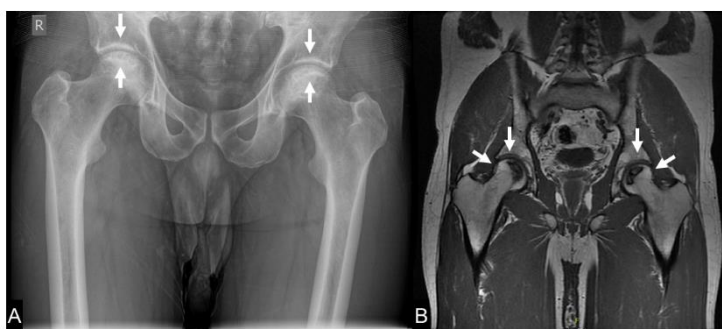

Figura 1

Necrosis avascular bilateral de las cabezas del fémur en un paciente con lupus eritematoso sistémico. El panel A muestra una radiografía postero-anterior de la pelvis, con evidencia de esclerosis subcondral en la cabeza del fémur en forma bilateral (flechas blancas). No se observan fracturas por insuficiencia y el espacio articular está preservado en ambas articulaciones. Esta radiografía correspondería a un grado 2, de acuerdo con la clasificación de Arlet y Ficat. El panel B muestra una resonancia magnética en T1, en proyección coronal con áreas crecientes de hipointensidad en T1 (flechas blancas), que concuerdan con necrosis avascular con compromiso de dos tercios de la superficie articular, bilateral. No hay fracturas por insuficiencia, Esta segunda técnica muestra una NAV grado 3, según Arlet y Ficat.

## PREVENCIÓN Y TAMIZAJE:

## Osteoporosis and avascular necrosis in lupus

Osteoporosis. El hallazgo de una densitometría ósea DXA) sugestiva de osteoporosis no es el único factor a considerar para prevenir fracturas en el futuro. Por ejemplo, con un puntaje T similar, los pacientes de distintas edades pueden tener un riesgo muy diferente de presentar fracturas, puesto que una edad más avanzada significa un mayor riesgo de fracturas. Adicionalmente, los pacientes con osteopenia (Puntaje T entre -1 y -2,5) pueden también presentar fracturas por fragilidad. La herramienta FRAX<sup>®</sup> se desarrolló utilizando la DMO y los diferentes factores de riesgo no radiológicos identificados. [30] Esta herramienta puede predecir el riesgo individual a 10 años, de desarrollar fracturas de cadera o fracturas mayores por OP, de acuerdo con los resultados de la DMO (que pueden no estar disponibles si no hay posibilidad de realizar el examen), la edad, el sexo, el peso, la estatura, fracturas previas, fractura de cadera de los padres, tabaquismo, uso de glucocorticoides, presencia de artritis reumatoide, causas secundarias de osteoporosis y consumo de alcohol. Se limita a pacientes de 50 o más años de edad. La herramienta FRAX<sup>®</sup> se ha adaptado a los diferentes países para equipararla con los diferentes factores de riesgo según la población; esta información está disponible en internet.

Revisando las indicaciones de las guías para la prevención y el tamizaje de osteoporosis actualizadas en 2019, conforme a las recomendaciones de EULAR para el manejo de LES, vemos que el tema no se aborda en dichas recomendaciones. Otras guías de práctica clínica recientes (2018) para pacientes adultos con LES, de la Asociación Canadiense de Reumatología [29], mostraron bajo nivel de evidencia para hacer las recomendaciones sobre salud ósea en LES. Estas indicaciones fueron las mismas que para la población general [31], pues la información específica para pacientes con LES fue escasa. Las recomendaciones fueron:

- Uso de la herramienta FRAX<sup>®</sup> para pacientes de  $\geq 50$  años de edad.
- Todos los individuos deben tener una DMO basal, si su edad es  $\geq 65$  años o si se trata de mujeres menopáusicas y los hombres entre 50-64 años, en caso de presentar algún factor de riesgo clínico (por ejemplo una fractura por fragilidad después de los 40 años de edad, uso prolongado de GC  $\geq 7,5$  mg/día durante más de 3 meses, uso de inhibidores de la aromatasa o terapia de privación androgénica, fractura de cadera de los padres, fractura vertebral u osteopenia identificada radiográficamente, fumador actual, alto consumo de alcohol, peso  $< 60$  Kg o pérdida de peso  $> 25\%$  del peso adulto a los 25 años, artritis reumatoide concomitante)

## Osteoporosis and avascular necrosis in lupus

- Para adultos < 50 años, está indicado el examen de DMO ante la presencia de fracturas por fragilidad, uso prolongado de GC  $\geq 7,5$  mg/día durante más de 3 meses, uso de inhibidores de la aromatasa o terapia de privación de andrógenos, hipogonadismo o menopausia prematura antes de los 45 años, síndromes de malabsorción (tales como enfermedad celiaca o enfermedad intestinal inflamatoria), hiperparatiroidismo primario, u otros trastornos asociados a una pérdida ósea rápida y/o fracturas.
- La reevaluación de riesgo, incluyendo la historia y un examen físico, así como una densitometría ósea para determinar la DMO deben repetirse periódicamente en los pacientes con factores de alto riesgo (por ejemplo cada 1 a 3 años). Los pacientes > 50 años sin factores de riesgo, con un riesgo de fractura a 10 años < 10%, deberán reevaluarse cada 5 años. No hay datos disponibles para pacientes más jóvenes.
- Debe considerarse el tamizaje para deficiencia de la 25-hidroxi-vitamina D en la valoración de osteoporosis.

En el escenario específico de OP inducida por glucocorticoides, el ACR publicó un documento guía en 2017 [32]. Las diferentes sugerencias para valoración del riesgo de fractura, son similares a las canadienses mencionadas anteriormente:

- La valoración clínica de riesgo debe hacerse dentro de los 6 meses siguientes al inicio de tratamiento con glucocorticoides.
- Para adultos < 40 años de edad, con factores de riesgo (historia de fractura por OP, o Z-score < -3 en cadera o columna, o > 10%/año de pérdida de la DMO en la cadera o en la columna, o consumo de GC  $\geq 30$  mg/día, u otros factores de riesgo para osteoporosis) se amerita hacer la densitometría ósea cada 2-3 años, no obstante el tratamiento.
- Para adultos  $\geq 40$  años de edad, debe usarse la DMO y la herramienta FRAX® cada 1-3 años en presencia de osteoporosis sin haber recibido tratamiento. En el caso de pacientes que están recibiendo tratamiento para la OP, en caso de uso de GC  $\geq 30$  mg/día, o de fractura por OP > 18 meses antes de inicio del tratamiento para la OP, o en caso de una pobre adherencia/absorción del medicamento, u otros factores de riesgo para OP, las pruebas de DMO deberán hacerse cada 2-3 años. Finalmente, los

## Osteoporosis and avascular necrosis in lupus

pacientes que completaron tratamiento para la OP deberán hacerse una evaluación de DMO cada 2-3 años.

Osteonecrosis. Algunos estudios han utilizado radiografías para el tamizaje sistemático de NAV asintomática. No existe una clara evidencia que demuestre que todos los casos asintomáticos progresarán hacia necrosis avascular clínicamente importante. Finalmente, no existe una herramienta de tamizaje validada para NAV. Por lo tanto, no puede darse una recomendación específica y la prevención deberá basarse en evitar los factores de riesgo, especialmente moderar la exposición a los glucocorticoides. [10,29] Sin embargo, ante la sospecha de NAV, un algoritmo razonable sería tomar una radiografía de la articulación o articulaciones afectadas, realizar una resonancia magnética si la radiografía es normal o no es patognomónica, y una gammagrafía ósea solo cuando no haya disponibilidad de resonancia. [33] Para confirmar el diagnóstico, una resonancia magnética es mejor para detectar la extensión de la NAV en una articulación, que la gammagrafía. Por lo tanto, en muchos centros puede que se elimine la gammagrafía ósea del algoritmo diagnóstico.

## TRATAMIENTO:

### Osteoporosis.

Tratamiento no farmacológico. Algunos factores de riesgo de OP son modificables. Dejar de fumar y limitar la ingesta de alcohol pueden ayudar a reducir la disminución de la DMO y la incidencia de fracturas secundarias. También se recomienda algo de ejercicio de levantar pesas. [34] La suplementación de vitamina D (800 IU/día) se ha asociado a una reducción del 15-20% de fracturas no vertebrales [35], y algunos recomiendan dosis aún más altas (tales como 1.000 a 2.000 IU/día). [36] Se recomienda la ingesta de calcio por vía oral o de suplementos entre 700 y 1200 mg/día, pero el calcio por si solo no ha disminuido el riesgo de fractura. [37] Adicionalmente, muchas recomendaciones se basan en una ingesta total de 1000 mg al día de calcio en la dieta y solo suplementar para completar los 1000 mg, por considerar un posible riesgo de calcificación coronaria y/o aórtica al excederse de 1000 mg/día [38,39], pero este planteamiento pareciera no ser consistente en varios estudios. [40]

## Osteoporosis and avascular necrosis in lupus

Tratamiento farmacológico. Las indicaciones para tratamiento de la OP en pacientes con LES son tratamiento activo en caso de OP documentada o profilaxis en el contexto de tratamiento prolongado con glucocorticoides. Los principales medicamentos disponibles para el tratamiento de la OP son los bisfosfonatos (alendronato, risedronato, pamidronate, zoledronato), denosumab (inhibidor del ligando RANK), agonistas de la hormona paratiroidea como teriparatida y romosozumab, y los anticuerpos monoclonales antiesclerostina; en menor grado, el uso de tratamiento hormonal y raloxifeno. La mayor evidencia proviene de estudios en mujeres postmenopáusicas sin LES. El acceso a los medicamentos y la cobertura por el seguro pudiera ser un problema, que puede variar según la geografía. En una revisión sistemática [41] comparando la eficacia de diferentes tratamientos para la OP para la prevención de fracturas, todos los medicamentos estudiados (alendronato, ibandronato, risedronato, ácido zoledrónico, denosumab, teriparatida y raloxifeno) previnieron las fracturas vertebrales en mujeres con OP (el número necesario a tratar fue entre 60-89 para prevenir 1 fractura durante 1-3 años de tratamiento). Solo un estudio mostró que el ácido zoledrónico prevenía las fracturas vertebrales en hombres (la mayoría de los estudios son en mujeres) con OP (número necesario a tratar 30 para prevenir 1 fractura durante 2 años de tratamiento). Con relación a las fracturas no vertebrales, el alendronato, risedronato, ácido zoledrónico, denosumab y teriparatide, previnieron este tipo de fracturas en mujeres con OP (número necesario a tratar 50-60 para prevenir 1 fractura durante 1-3 años de tratamiento). Huelga decir que el NNT es mayor si se trata la osteopenia sin fractura por fragilidad. Los efectos secundarios difieren entre los distintos medicamentos. Los bisfosfonatos pueden producir síntomas gastrointestinales leves y en raras oportunidades fracturas subtrocantéricas y osteonecrosis del maxilar. El ácido zoledrónico puede producir hipocalcemia y síntomas tipo influenza. Denosumab puede producir síntomas del tracto gastrointestinal superior e hipocalcemia. En pacientes tratados con teriparatida, se han reportado síntomas del tracto gastrointestinal medio superior, dolor de cabeza e hipercalcemia. Puesto que el raloxifeno (y los tratamientos hormonales postmenopáusicos) aumentan el riesgo de trombosis, su uso en pacientes con LES, con posibles anticuerpos antifosfolípidos, posiblemente debería evitarse. El estroncio no está aprobado en la mayoría de los países para el tratamiento de la osteoporosis.

## Osteoporosis and avascular necrosis in lupus

Las guías británicas [34] y canadienses [31] para la osteoporosis concuerdan en recomendar el uso de bisfosfonatos orales como la medida más costo-efectiva, y en segundo lugar denosumab. Los efectos secundarios y las comorbilidades pueden determinar la elección del tratamiento inicial (Tabla 1). La posibilidad de utilizar teriparatida se restringe a una tercera línea debido a alta carga financiera pero es muy efectiva para la activación de los osteoblastos, más que los osteoclastos, por lo cual aumenta la masa ósea. La duración del tratamiento suele ser de máximo dos años. La DMO puede disminuir ligeramente en los pacientes tratados con bisfosfonatos después de discontinuarlos. [42] Sin embargo, los pacientes tratados con denosumab tendrán una caída rápida y significativa de su DMO, además de un mayor riesgo de nuevas fracturas después de discontinuar el tratamiento. [43]

Para la prevención de la osteoporosis inducida por glucocorticoides (OPIG), se deben tratar de evitar o reducir los GCs en LES. Mantener las dosis por debajo de 7,5 mg/día o utilizar pulsos endovenosos en lugar de dosis más altas regulares de GC, junto con el inicio más temprano de fármacos inmunosupresores, puede reducir la incidencia de los efectos secundarios relacionados con glucocorticoides, incluyendo OPIG. [44] Cuando se inicia un paciente con altas dosis de GC, la DMO disminuye rápidamente en los primeros meses, especialmente de hueso trabecular que se encuentra más que todo en la columna lumbar que en la cadera. Esta pérdida de la densidad ósea es parcialmente reversible. [45] En términos de las medidas farmacológicas dirigidas a OPIG, las más recientes recomendaciones del ACR en 2017 sugieren:

- Las mismas intervenciones no farmacológicas que para la osteoporosis.
- Para adultos < 40 años de edad, con factores de riesgo (historia de fractura por OP, o Z-score < -3 en cadera o columna y prednisona  $\geq$  7,5 mg/día, o > 10%/año de pérdida de la DMO en cadera o columna, o GC  $\geq$  30 mg/día, u otros factores de riesgo para osteoporosis), iniciar con bisfosfonatos por vía oral. De no ser posible, considerar los otros medicamentos utilizados para la OP.
- Para adultos  $\geq$  40 años de edad, con factores de riesgo (historia de fractura por OP, u hombres  $\geq$  50 años y mujeres pre-menopáusicas con un puntaje T  $\leq$  -2,5 en cadera o columna, o FRAX (ajustado para GC) riesgo a 10 años de fractura mayor por OP  $\geq$  10%, o FRAX (ajustado para GC) riesgo de fractura de cadera a 10 años > 1%, o prednisona  $\geq$  30 mg/día; la recomendación es tratamiento con bisfosfonatos por vía oral. En caso de

## Osteoporosis and avascular necrosis in lupus

intolerancia, utilizar en orden de preferencia: ácido zoledrónico endovenoso, teriparatida, y denosumab.

- En mujeres en edad fértil, los bisfosfonatos por vía oral serán la primera línea de elección y teriparatida la segunda. En caso de embarazo, se debe advertir a la paciente que no se cuenta con suficiente información para considerar seguro el tratamiento.

Existe muy poca información sobre el uso de tratamiento para la OP en pacientes menores de 40 años de edad, por lo cual inicialmente se prueba con monitoreo estricto de los pacientes con LES que reciben corticoesteroides, y suplementarlos con calcio y vitamina D. Recientemente, un estudio retrospectivo de 203 pacientes con LES, demostró que aproximadamente el 60% de los pacientes con LES mayores de 40 años de edad, en riesgo de desarrollar OPIG, recibieron Vitamina D; 70% de los que deberían estar en tratamiento con bisfosfonatos no se los prescribieron, mientras 10% de los pacientes a quienes se los prescribieron, no cumplían con las guías ACR 2017 para OPIG. [46] Por lo tanto, existe una brecha en el cuidado de estos pacientes.

Osteonecrosis. La intención de preservar las articulaciones guiará el tratamiento de la Necrosis Avascular. Los pacientes con NAV estadio 1 pueden tener una regresión espontánea. La observación puede ser una opción aceptable, especialmente en áreas que soportan menos peso, como serían los hombros. Las caderas y las rodillas tienen una mayor probabilidad de progresar a NAV sintomática. Una vez establecido el daño, deberán adoptarse estrategias para preservar el hueso, tales como ejercicio de bajo impacto y tratamiento sintomático con paracetamol, o AINEs, si no están contraindicados. No hay certeza de que los bisfosfonatos ayuden. Una vez se ha lesionado la articulación, posiblemente sea menor la probabilidad de empeorar la articulación con la administración de inyecciones de corticoesteroides intra-articulares para aliviar los síntomas. Sin embargo, no hay datos para respaldar este abordaje, pero puede mejorar el dolor y prolongar la necesidad de hacer un reemplazo articular. Finalmente, el reemplazo articular está reservado para pacientes con colapso de la articulación. [47] Desafortunadamente, ninguna de las guías de LES abordan el tema del tratamiento de la necrosis avascular.

Tratamiento farmacológico. Se han intentado múltiples intervenciones, pero solo en pequeños estudios observacionales y no hay estudios aleatorizados. El uso del alendronato a una dosis de



## Osteoporosis and avascular necrosis in lupus

10 mg día, mostró la sobrevida de la cadera (evitando la necesidad de reemplazo articular) después de 3 años, en el 87% de los pacientes con necrosis avascular de la cadera. [48] Otros agentes como los hipolipemiantes y los anticoagulantes han reportado beneficios potenciales [47], pero no son el estándar de cuidado.

Modalidades físicas. La terapia con ondas de choque extracorpóreas, el oxígeno hiperbárico y la terapia electromagnética pulsada, han demostrado algunos resultados, pero se necesitan más estudios que brinden mayor orientación. [47] Una vez más, estas modalidades no son el estándar de cuidado.

Tratamiento quirúrgico. Las opciones para preservar el hueso incluyen descompresión con o sin injerto óseo; fresado percutáneo, injerto óseo con injertos vascularizados o no vascularizados; y osteotomía. [26] La descompresión ósea consiste básicamente en perforar algunos orificios en las áreas necrosadas subcorticales del hueso. La técnica ha evolucionado de la perforación de orificios de mayor calibre al uso actual de orificios más pequeños, previniendo alrededor del 70% de los reemplazos de cadera. [49,50] Una tasa de éxito comparable del 87% se ha reportado para osteonecrosis de rodilla en pacientes con LES. [51] El injerto libre vascularizado del peroné (ILVP) es una técnica quirúrgica más compleja, que puede generar complicaciones en el sitio donante y tiempos quirúrgicos más prolongados. En un estudio en 80 caderas en pacientes con LES y con NAV, después de una media de seguimiento de 4,3 años, ninguna de las caderas requirió artroplastia. [52] Finalmente, pueden considerarse las osteotomías como la rotacional transtrocantérica anterior, pero los estudios en pacientes con LES mostraron una tasa de 50% de reconversión a artroplastia. [53] En la mayoría de los centros, ninguna de estas opciones se realiza de rutina, siendo el reemplazo articular el tratamiento de elección para la NAV terminal.

Artroplastia. Este es el tratamiento preferido cuando se produce el colapso del hueso necrosado. Existe una gran experiencia positiva en pacientes con LES y NAV de cadera, con tasas de éxito entre el 90 y el 100%, y una significativa mejoría funcional. [54,55] No hay diferencias en los desenlaces entre pacientes con y sin LES. Otras articulaciones como las rodillas y los hombros, se pueden reemplazar exitosamente. [47] La desventaja de los reemplazos totales de articulación en pacientes jóvenes con LES y NAV severa, son que puede ser necesario llevar a cabo revisiones o repetir la artroplastia a lo largo de sus vidas, pero no es una contraindicaciones

## Osteoporosis and avascular necrosis in lupus

realizar la cirugía y ello puede mejorar considerablemente la calidad de vida, tanto en términos de alivio del dolor como de mejor función.

### CONCLUSIONES:

Los problemas relacionados con la salud ósea (OP y NAV) son frecuentes en los pacientes con LES y generan un deterioro funcional significativo y pérdida de la calidad de vida. La menopausia, la duración de la enfermedad y el uso de prednisona son predictores de osteoporosis. Existen múltiples factores de riesgo relacionados con las fracturas por OP, incluyendo la duración de la enfermedad, la edad, un mayor índice de masa corporal, historia de fractura en el pasado, uso de corticoesteroides, convulsiones, eventos cerebrovasculares, y mayor daño. La racionalización del uso de los glucocorticoides tendrá un impacto tanto sobre la osteoporosis, como sobre la baja densidad ósea y la osteonecrosis. El tamizaje con densitometría ósea cuando corresponda, así como el tratamiento farmacológico precoz, reducirán las complicaciones de la osteoporosis. La necrosis avascular está estrechamente relacionada con el uso de glucocorticoides y no se recomienda tamizaje. Evitar los esteroides debe prevenir la NAV en la mayoría de los pacientes con LES y la necrosis avascular se trata con reemplazo articular, usualmente con muy buenos resultados.

### FINANCIAMIENTO:

Ninguno para éste manuscrito. A.F.C. recibió honorarios de consultoría de Boehringer Ingelheim, Actelion y Bayer. A.F.C. recibió una donación de la Sociedad Española de Medicina Interna. J.E.P. recibió honorarios de consultoría de Actelion, Amgen, Abbvie, Bayer, Boehringer Ingelheim, BMS, Eli Lilly, Galapagos, Gilead, Janssen, Medexus, Merck, Novartis, Pfizer, Roche, Samsung, Sandoz, Sanofi, Teva, UCB.

## Osteoporosis and avascular necrosis in lupus

Tabla 1

Tratamientos comunes en osteoporosis y lupus eritematoso sistémico

| Medicamento  | Dosis/administración              | Principales efectos secundarios                                                                                                                                        | Costo    |
|--------------|-----------------------------------|------------------------------------------------------------------------------------------------------------------------------------------------------------------------|----------|
| Alendronato  | 70 mg semanal/po                  | Artralgia (común)<br>Síntomas GI del cuadrante superior medio (frecuentes)<br>Fracturas subtrocantéricas atípicas (raras)<br>Osteonecrosis del maxilar inferior (rara) | Bajo     |
| Risedronato  | 150 mg mes/po                     | Igual que con alendronato                                                                                                                                              | Bajo     |
| Zoledronato  | 35 mg semanal/po<br>5 mg anual/iv | Igual que con alendronato<br>Síntomas tipo influenza (raro)<br>Hipocalcemia (rara)                                                                                     | Bajo     |
| Denosumab    | 60 mg cada 6 meses/sc             | Artralgia (común)<br>Síntomas GI del cuadrante superior medio (comunes)<br>Infecciones (ocasionales)<br>Hipocalcemia (ocasional)                                       | Moderado |
| Teriparatida | 20 mcg día/sc                     | Artralgia (común)<br>Síntomas GI del cuadrante superior medio (comunes)<br>Dolor de cabeza (común)<br>Hipercalcemia (rara)                                             | Alto     |

po = per os, iv = intravenoso, sc= subcutáneo, GI = gastrointestinal

### REFERENCIAS:

- 1 Yee CS, Crabtree N, Skan J, *et al.* Prevalence and predictors of fragility fractures in systemic lupus erythematosus. *Ann Rheum Dis* 2005;**64**:111–3.  
doi:10.1136/ard.2003.018127
- 2 Cramarossa G, Urowitz MB, Su J, *et al.* Prevalence and associated factors of low bone mass in adults with systemic lupus erythematosus. *Lupus* 2017;**26**:365–72.  
doi:10.1177/0961203316664597
- 3 Xia J, Luo R, Guo S, *et al.* Prevalence and Risk Factors of Reduced Bone Mineral Density in Systemic Lupus Erythematosus Patients: A Meta-Analysis. *Biomed Res Int* 2019;**2019**:3731648. doi:10.1155/2019/3731648
- 4 Salman-Monte TC, Torrente-Segarra V, Vega-Vidal AL, *et al.* Bone mineral density and

## Osteoporosis and avascular necrosis in lupus

- vitamin D status in systemic lupus erythematosus (SLE): A systematic review.  
*Autoimmun Rev* 2017;**16**:1155–9. doi:10.1016/j.autrev.2017.09.011
- 5 Murdaca G, Tonacci A, Negrini S, *et al.* Emerging role of vitamin D in autoimmune diseases: An update on evidence and therapeutic implications. *Autoimmun Rev* 2019;**18**:102350. doi:10.1016/j.autrev.2019.102350
- 6 Kim CS, Han K-D, Jung JH, *et al.* Incidence and risk factors for osteoporotic fractures in patients with systemic lupus erythematosus versus matched controls. *Korean J Intern Med* Published Online First: 26 June 2019. doi:10.3904/kjim.2018.378
- 7 Rees F, Doherty M, Grainge M, *et al.* Burden of Comorbidity in Systemic Lupus Erythematosus in the UK, 1999–2012. *Arthritis Care Res (Hoboken)* 2016;**68**:819–27. doi:10.1002/acr.22751
- 8 Mok CC, Ying SKY, Chi HT, *et al.* Bone mineral density and body composition in men with systemic lupus erythematosus: A case control study. *Bone* 2008;**43**:327–31. doi:10.1016/j.bone.2008.04.003
- 9 Nevskaya T, Gamble MP, Pope JE. A meta-analysis of avascular necrosis in systemic lupus erythematosus: prevalence and risk factors. *Clin Exp Rheumatol* 2017;**35**:700–10.  
<http://www.ncbi.nlm.nih.gov/pubmed/28240590>
- 10 Gladman DD, Dhillon N, Su J, *et al.* Osteonecrosis in SLE: prevalence, patterns, outcomes and predictors. *Lupus* 2018;**27**:76–81. doi:10.1177/0961203317711012
- 11 Hussein S, Suitner M, Béland-Bonenfant S, *et al.* Monitoring of osteonecrosis in systemic lupus erythematosus: A systematic review and metaanalysis. *J Rheumatol* 2018;**45**:1462–76. doi:10.3899/jrheum.170837
- 12 Zhu KK, Xu WD, Pan HF, *et al.* The Risk Factors of Avascular Necrosis in Patients with Systemic Lupus Erythematosus: a Meta-analysis. *Inflammation* 2014;**37**:1852–64. doi:10.1007/s10753-014-9917-y
- 13 Eastell R, O'Neill TW, Hofbauer LC, *et al.* Postmenopausal osteoporosis. *Nat Rev Dis Prim* 2016;**2**:16069. doi:10.1038/nrdp.2016.69

## Osteoporosis and avascular necrosis in lupus

- 14 Dallas SL, Prideaux M, Bonewald LF. The osteocyte: An endocrine cell . . . and more. *Endocr Rev* 2013;**34**:658–90. doi:10.1210/er.2012-1026
- 15 Chotiyarnwong P, McCloskey E V. Pathogenesis of glucocorticoid-induced osteoporosis and options for treatment. *Nat Rev Endocrinol* 2020;**16**:437–47. doi:10.1038/s41574-020-0341-0
- 16 Shen C, Chen F, Zhang Y, *et al.* Association between use of antiepileptic drugs and fracture risk: A systematic review and meta-analysis. *Bone* 2014;**64**:246–53. doi:10.1016/j.bone.2014.04.018
- 17 Carli L, Tani C, Spera V, *et al.* Risk factors for osteoporosis and fragility fractures in patients with systemic lupus erythematosus. *Lupus Sci Med* 2016;**3**:e000098. doi:10.1136/lupus-2015-000098
- 18 Katsifis GE, Tzioufas AG. Ovarian failure in systemic lupus erythematosus patients treated with pulsed intravenous cyclophosphamide. *Lupus* 2004;**13**:673–8. doi:10.1191/0961203304lu2012oa
- 19 Bultink IEM, Lems WF. Lupus and fractures. *Curr Opin Rheumatol* 2016;**28**:426–32. doi:10.1097/BOR.0000000000000290
- 20 Mont MA, Hungerford DS. Non-traumatic avascular necrosis of the femoral head. *J Bone Joint Surg Am* 1995;**77**:459–74. doi:10.2106/00004623-199503000-00018
- 21 Lane NE. Therapy Insight: Osteoporosis and osteonecrosis in systemic lupus erythematosus. *Nat Clin Pract Rheumatol* 2006;**2**:562–9. doi:10.1038/ncprheum0298
- 22 Kanis JA, Adachi JD, Cooper C, *et al.* Standardising the descriptive epidemiology of osteoporosis: Recommendations from the Epidemiology and Quality of Life Working Group of IOF. *Osteoporos Int* 2013;**24**:2763–4. doi:10.1007/s00198-013-2413-7
- 23 Assessment of fracture risk and its application to screening for postmenopausal osteoporosis. Report of a WHO Study Group. *World Health Organ Tech Rep Ser* 1994;**843**:1–129. <https://pubmed.ncbi.nlm.nih.gov/7941614/> (accessed 18 Nov 2020).
- 24 Lee C, Ramsey-Goldman R. Bone health and systemic lupus erythematosus. *Curr*

## Osteoporosis and avascular necrosis in lupus

- Rheumatol Rep* 2005;**7**:482–9. doi:10.1007/s11926-005-0056-1
- 25 Gordon CM, Leonard MB, Zemel BS, *et al.* 2013 Pediatric Position Development Conference: executive summary and reflections. *J Clin Densitom* 2014;**17**:219–24. doi:10.1016/j.jocd.2014.01.007
  - 26 Pivec R, Johnson AJ, Harwin SF, *et al.* Differentiation, diagnosis, and treatment of osteoarthritis, osteonecrosis, and rapidly progressive osteoarthritis. *Orthopedics* 2013;**36**:118–25. doi:10.3928/01477447-20130122-04
  - 27 Arlet J, Ficat P. [Non-traumatic avascular femur head necrosis. New methods of examination and new concepts]. *Chir Narzadow Ruchu Ortop Pol* 1977;**42**:269–76. <https://pubmed.ncbi.nlm.nih.gov/885011/> (accessed 25 Nov 2020).
  - 28 Mont MA, Ulrich SD, Seyler TM, *et al.* Bone scanning of limited value for diagnosis of symptomatic oligofocal and multifocal osteonecrosis. *J Rheumatol* 2008;**35**:1629–34. <https://pubmed.ncbi.nlm.nih.gov/18528962/> (accessed 25 Nov 2020).
  - 29 Keeling SO, Alabdurubalnabi Z, Avina-Zubieta A, *et al.* Canadian rheumatology association recommendations for the assessment and monitoring of systemic lupus erythematosus. *J Rheumatol* 2018;**45**:1426–39. doi:10.3899/jrheum.171459
  - 30 Kanis JA, McCloskey E V., Johansson H, *et al.* Development and use of FRAX in osteoporosis. *Osteoporos Int* 2010;**21 Suppl 2**:S407-13. doi:10.1007/s00198-010-1253-y
  - 31 Papaioannou A, Morin S, Cheung AM, *et al.* 2010 clinical practice guidelines for the diagnosis and management of osteoporosis in Canada: summary. *CMAJ* 2010;**182**:1864–73. doi:10.1503/cmaj.100771
  - 32 Buckley L, Guyatt G, Fink HA, *et al.* 2017 American College of Rheumatology Guideline for the Prevention and Treatment of Glucocorticoid-Induced Osteoporosis. *Arthritis Rheumatol (Hoboken, NJ)* 2017;**69**:1521–37. doi:10.1002/art.40137
  - 33 Diagnosis of Acute or Subacute Avascular Necrosis | CADTH.ca. <https://www.cadth.ca/diagnosis-acute-or-subacute-avascular-necrosis> (accessed 5 Dec

## Osteoporosis and avascular necrosis in lupus

2020).

- 34 Compston J, Cooper A, Cooper C, *et al.* UK clinical guideline for the prevention and treatment of osteoporosis. *Arch Osteoporos* 2017;**12**. doi:10.1007/s11657-017-0324-5
- 35 Bischoff-Ferrari HA, Willett WC, Orav EJ, *et al.* A pooled analysis of vitamin D dose requirements for fracture prevention. *N Engl J Med* 2012;**367**:40–9. doi:10.1056/NEJMoA1109617
- 36 Hanley DA, Cranney A, Jones G, *et al.* Vitamin D in adult health and disease: a review and guideline statement from Osteoporosis Canada (summary). *CMAJ* 2010;**182**:1315–9. doi:10.1503/cmaj.091062
- 37 Reid IR, Bristow SM, Bolland MJ. Calcium supplements: benefits and risks. *J Intern Med* 2015;**278**:354–68. doi:10.1111/joim.12394
- 38 Manson JE, Allison MA, Carr JJ, *et al.* Calcium/Vitamin D Supplementation and Coronary Artery Calcification. *Menopause* 2010;**17**:683–91. doi:10.1097/gme.0b013e3181d683b5.Calcium/Vitamin
- 39 Wang TKM, Bolland MJ, van Pelt NC, *et al.* Relationships between vascular calcification, calcium metabolism, bone density, and fractures. *J Bone Miner Res* 2010;**25**:2777–85. doi:10.1002/jbmr.183
- 40 Samelson EJ, Booth SL, Fox CS, *et al.* Calcium intake is not associated with increased coronary artery calcification: the Framingham Study. *Am J Clin Nutr* 2012;**96**:1274–80. doi:10.3945/ajcn.112.044230
- 41 Crandall CJ, Newberry SJ, Diamant A, *et al.* Comparative effectiveness of pharmacologic treatments to prevent fractures: An updated systematic review. *Ann Intern Med* 2014;**161**:711–23. doi:10.7326/M14-0317
- 42 Black DM, Schwartz A V., Ensrud KE, *et al.* Effects of continuing or stopping alendronate after 5 years of treatment: The Fracture Intervention Trial long-term extension (FLEX): A randomized trial. *J Am Med Assoc* 2006;**296**:2927–38. doi:10.1001/jama.296.24.2927
- 43 Bone HG, Bolognese MA, Yuen CK, *et al.* Effects of denosumab treatment and

## Osteoporosis and avascular necrosis in lupus

- discontinuation on bone mineral density and bone turnover markers in postmenopausal women with low bone mass. *J Clin Endocrinol Metab* 2011;**96**:972–80.  
doi:10.1210/jc.2010-1502
- 44 Fanouriakis A, Kostopoulou M, Alunno A, *et al.* 2019 Update of the EULAR recommendations for the management of systemic lupus erythematosus. *Ann Rheum Dis* 2019;**78**:736–45. doi:10.1136/annrheumdis-2019-215089
- 45 Laan RF, van Riel PL, van de Putte LB, *et al.* Low-dose prednisone induces rapid reversible axial bone loss in patients with rheumatoid arthritis. A randomized, controlled study. *Ann Intern Med* 1993;**119**:963–8. doi:10.7326/0003-4819-119-10-199311150-00001
- 46 Sapkota S, Baig S, Hess T, *et al.* Vitamin D and bisphosphonate therapy in systemic lupus erythematosus patients who receive glucocorticoids: are we offering the best care? *Lupus* 2020;**29**:263–72. doi:10.1177/0961203320903086
- 47 Ehmke TA, Cherian JJ, Wu ES, *et al.* Treatment of osteonecrosis in systemic lupus erythematosus: a review. *Curr Rheumatol Rep* 2014;**16**:441. doi:10.1007/s11926-014-0441-8
- 48 Agarwala S, Shah SB. Ten-Year Follow-Up of Avascular Necrosis of Femoral Head Treated With Alendronate for 3 Years. *J Arthroplasty* 2011;**26**:1128–34.  
doi:10.1016/j.arth.2010.11.010
- 49 Mont MA, Carbone JJ, Fairbank AC. Core decompression versus nonoperative management for osteonecrosis of the hip. *Clin Orthop Relat Res* 1996;:169–78.  
doi:10.1097/00003086-199603000-00020
- 50 Mont MA, Ragland PS, Etienne G. Core decompression of the femoral head for osteonecrosis using percutaneous multiple small-diameter drilling. *Clin Orthop Relat Res* 2004;:131–8. doi:10.1097/01.blo.0000150128.57777.8e
- 51 Marulanda G, Seyler TM, Sheikh NH, *et al.* Percutaneous drilling for the treatment of secondary osteonecrosis of the knee. *J Bone Jt Surg - Ser B* 2006;**88**:740–6.  
doi:10.1302/0301-620X.88B6.17459



## Osteoporosis and avascular necrosis in lupus

- 52 Sun Y, Zhang CQ, Chen SB, *et al.* Treatment of femoral head osteonecrosis in patients with systemic lupus erythematosus by free vascularised fibular grafting. *Lupus* 2009;**18**:1061–5. doi:10.1177/0961203309106490
- 53 Motomura G, Yamamoto T, Suenaga K, *et al.* Long-term outcome of transtrochanteric anterior rotational osteotomy for osteonecrosis of the femoral head in patients with systemic lupus erythematosus. *Lupus* 2010;**19**:860–5. doi:10.1177/0961203310361896
- 54 Woo MS, Kang JS, Moon KH. Outcome of total hip arthroplasty for avascular necrosis of the femoral head in systemic lupus erythematosus. *J Arthroplasty* 2014;**29**:2267–70. doi:10.1016/j.arth.2013.12.028
- 55 Hanssen AD, Cabanela ME, Michet CJ. Hip arthroplasty in patients with systemic lupus erythematosus. *J Bone Joint Surg Am* 1987;**69**:807–14. <https://pubmed.ncbi.nlm.nih.gov/3597492/> (accessed 25 Nov 2020).
